# Supplementary material for: The ‘Candidatus Phytoplasma mali’ effector protein SAP11CaPm interacts with MdTCP16, a class II CYC/TB1 transcription factor that is highly expressed during phytoplasma infection
Source: PubMed Central journal article supplement (PMC9754288; doi:10.1371/journal.pone.0272467), 2022-12-15

The '*Candidatus* Phytoplasma mali' effector protein SAP11<sub>CaPm</sub> interacts with MdTCP16.

**S1 Fig. Reference Sequence of XM\_008376500.2.** The sequence includes the CDS for XP\_008374722.1 (*MdTCP16*) with TCP domain and the identified part in the Y2H screen. Graph was generated with Geneious R11.1.5.

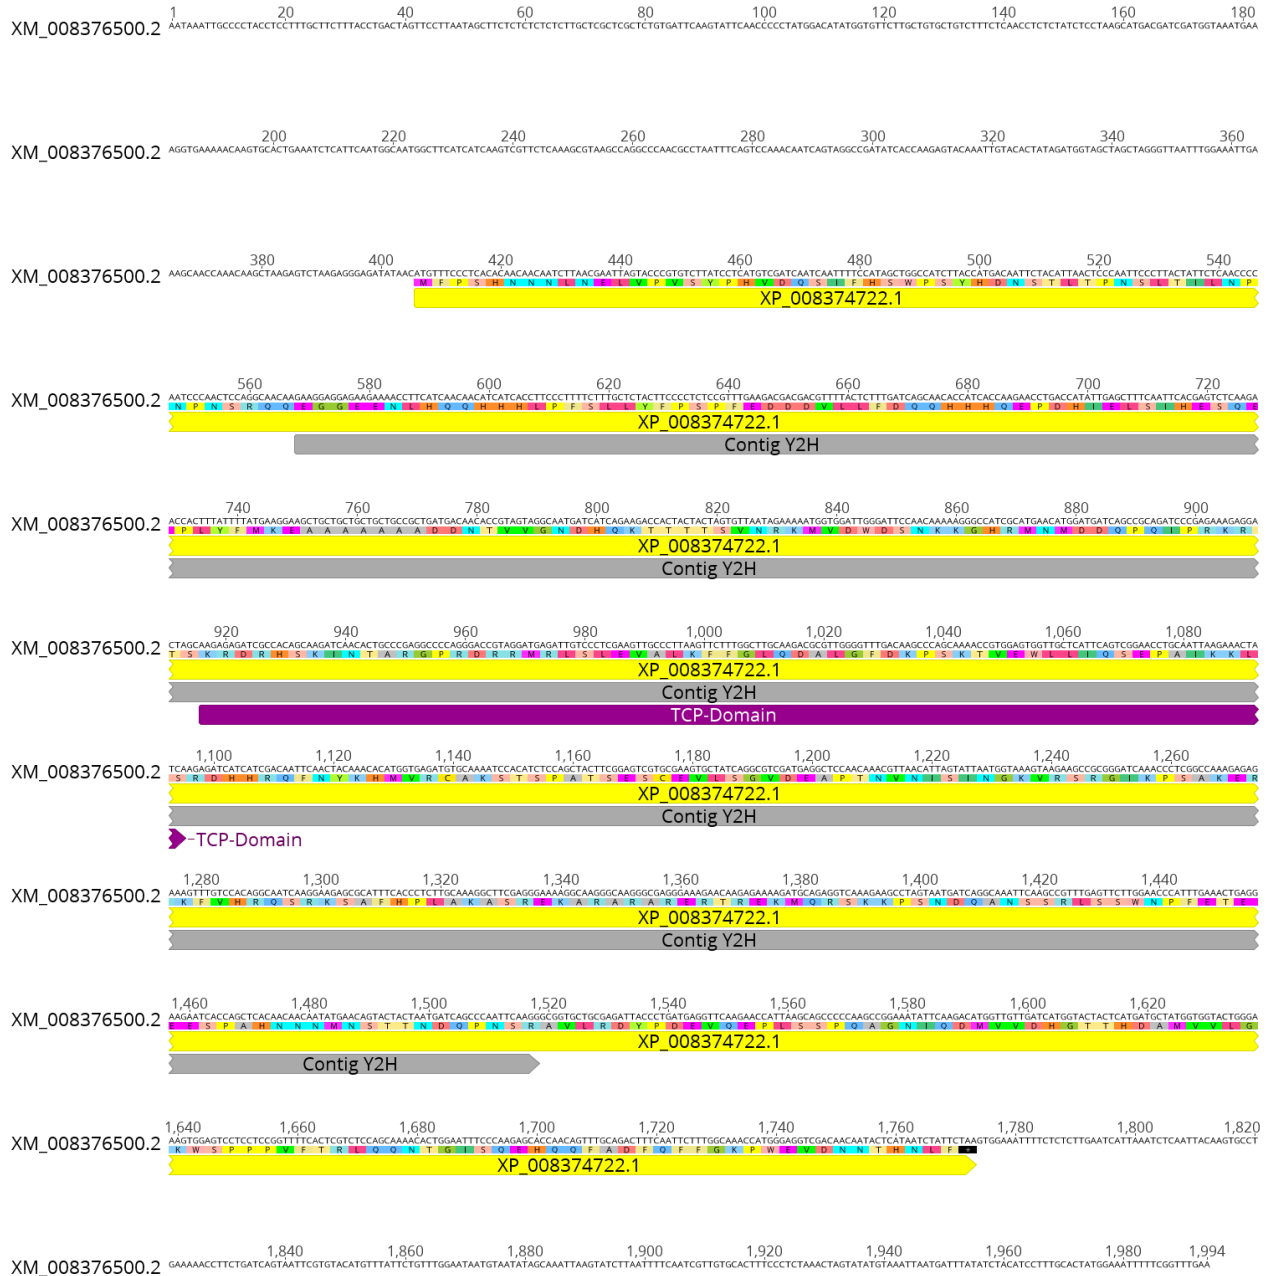

Supplement: pone.0272467.s001.pdf [file pone.0272467.s001.pdf]
