# Supplementary material for: The ‘Candidatus Phytoplasma mali’ effector protein SAP11CaPm interacts with MdTCP16, a class II CYC/TB1 transcription factor that is highly expressed during phytoplasma infection
Source: PubMed Central journal article supplement (PMC9754288; doi:10.1371/journal.pone.0272467), 2022-12-15

**S2 Fig. Phytoplasma concentration of leaf and root samples.** The normalized phytoplasma concentration is given as the ratio of the '*Ca. P. mali*' specific *16S* gene copies and the *Malus x domestica* single-copy gene *ACO*. Phytoplasma concentration was quantified in seven infected leaf samples from greenhouse plants (three from spring and four from autumn), in three naturally infected pooled leaf samples (one from spring, two from autumn) and in one naturally infected pooled root sample (autumn).

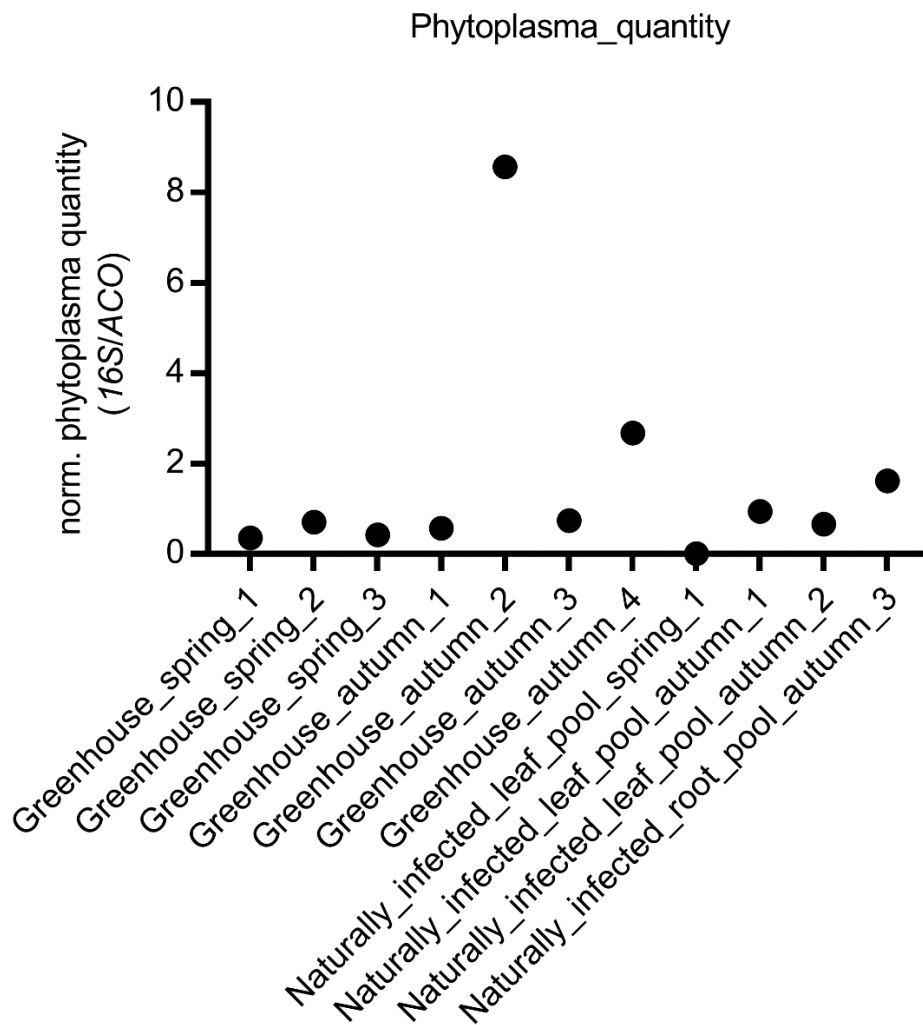

Supplement: pone.0272467.s002.pdf [file pone.0272467.s002.pdf]
