# Supplementary material for: The ‘Candidatus Phytoplasma mali’ effector protein SAP11CaPm interacts with MdTCP16, a class II CYC/TB1 transcription factor that is highly expressed during phytoplasma infection
Source: PubMed Central journal article supplement (PMC9754288; doi:10.1371/journal.pone.0272467), 2022-12-15
Supplement: pone.0272467.s003.pdf [file pone.0272467.s003.pdf]

**S1 Table. Primers used in this study.**

| Name                | Sequence                                              | Reference        |
|---------------------|-------------------------------------------------------|------------------|
| ATP00189pP_B3       | ggggacaacttgtataataaaagtgctATGTCTCCTCCTAAAAAAGATT     | This publication |
| ATP00189pP_B2       | ggggaccacttgtacaagaaagctgggtaTTATTTTTTCCTTTGTCTTTATTG | This publication |
| ATP00189pP_B2ns     | ggggaccacttgtacaagaaagctgggtaTTTTTTTCCTTTGTCTTTATTGTT | This publication |
| MdTCP16_B1          | ggggacaagttgtacaaaaagcaggcttaATGTTTCCTCACACAACAAC     | This publication |
| MdTCP16_B4          | ggggacaacttgtatagaaaagttgggtTGAATAGATTATGAGTATTGTT    | This publication |
| MdTCP16_B4ns        | ggggacaacttgtatagaaaagttgggtGAATAGATTATGAGTATTGTTGT   | This publication |
| MdTCP16_SfilA_fwd   | ccccccggccattacggccATGTTTCCTCACACAACAAC               | This publication |
| MdTCP16_SfilB_rev   | ccccccggccgagggccTTAGAATAGATTATGAGTATTGTT             | This publication |
| qMdTCP16_fw         | AAGATCAACACTGCCCGAGG                                  | This publication |
| qMdTCP16_rv         | GCGTCTTGCAAGCCAAAGAA                                  | This publication |
| qMdTCP25_fw         | ATTGTTTCGATCCACCGGACG                                 | This publication |
| qMdTCP25_rv         | GAATTGGATGGCAGTGTGGG                                  | This publication |
| qMdTCP24_fw         | AGAAGGCCCTAGCAGTGGAA                                  | This publication |
| qMdTCP24_rv         | TCTTTCGACTTTGCTCGCCA                                  | This publication |
| Md_GAPDH_fw         | GTTTCGTTGTTGGTGTGAACG                                 | [1]              |
| Md_GAPDH_rv         | GTCTTCTGGGTGGCAGTGAT                                  | [1]              |
| Md_tip41_fw         | ACATGCCGGAGATGGTGTGTTGG                               | [2]              |
| Md_tip41_rv         | ACTTCCAGAGTACGGCGTTGTG                                | [2]              |
| Md_EF1 $\alpha$ _fw | ACTGTTCTGTTGGACGTGTTG                                 | [2]              |
| Md_EF1 $\alpha$ _rv | TGGAGTTGGAAGCAACGTACCC                                | [2]              |

Lowercase letters indicate bases for Gateway-*attB* site overhangs or *Sfil* restriction site overhangs.

[1] Guerriero G, Giorno F, Ciccotti AM, Schmidt S, Baric S. A gene expression analysis of cell wall biosynthetic genes in *Malus x domestica* infected by '*Candidatus Phytoplasma mali*'. Tree Physiol. 2012; 32:1365–77. doi: 10.1093/treephys/tps095 PMID: 23086810.

[2] Giorno F, Guerriero G, Biagetti M, Ciccotti AM, Baric S. Gene expression and biochemical changes of carbohydrate metabolism in in vitro micro-propagated apple plantlets infected by '*Candidatus Phytoplasma mali*'. Plant Physiol Biochem. 2013; 70:311–7. doi: 10.1016/j.plaphy.2013.05.040 PMID: 23811119.
